# Supplementary material for: Facile synthesis of a three-dimensional hydroxyapatite monolith for protein adsorption
Source: Royal Society of Chemistry journal article supplement (doi:10.1039/d1tb02021h), 2021-01-01
Supplement: d1tb02021h1.pdf [file d1tb02021h1.pdf]

## **Facile Synthesis of Three-Dimensional Hydroxyapatite Monolith for Protein Adsorption**

Yanting Lyu,<sup>a</sup> Taka-Aki Asoh<sup>\*a</sup> and Hiroshi Uyama<sup>\*a</sup>

Department of Applied Chemistry, Graduate School of Engineering, Osaka University, 2-1

Yamadaoka, Suita, Osaka 565-0871, Japan

E-mail: asoh@chem.eng.osaka-u.ac.jp, uyama@chem.eng.osaka-u.ac.jp

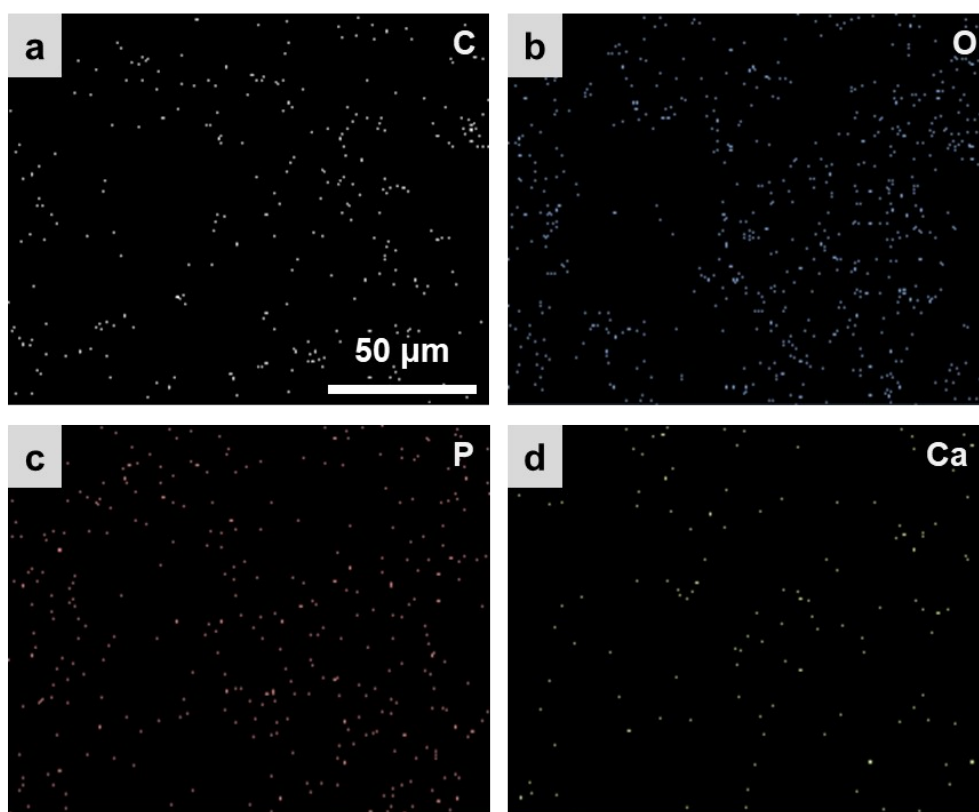

Fig. S1 EDX (a) C, (b) O, (c) P and (d) Ca mapping images of cellulose80\_HA2.
